# Supplementary material
Source: PubMed Central journal article supplement (PMC2967391)
Supplement: supp_110.034942_DMD34942_SuppFigs.pdf [file supp_110.034942_DMD34942_SuppFigs.pdf]

## Supplemental Data

Cytochrome P450 2C8 Exists as a Dimer in Natural Membranes.

Gang Hu, Eric F. Johnson, and Byron Kemper

Drug Metabolism and Disposition

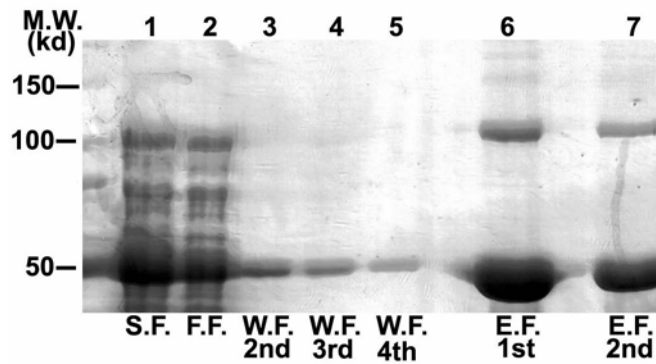

Figure S1. Commassie blue staining of purified 2C8H. Monomeric (lower band, lane 6) and dimeric (upper band, lane 6) 2C8H were purified using affinity column after bacterial membrane expressing 2C8H was treated with BMOE. S.F.: solubilized fraction; F.F.: flow-through fraction; W.F.: washing fraction; E.F.: elution fraction.
